# Supplementary material for: Genome-wide identification of the pectin methylesterase inhibitor genes in Brassica napus and expression analysis of selected members
Source: Front Plant Sci. 2022 Jul 22;13:940284. doi: 10.3389/fpls.2022.940284 (PMC9354821; doi:10.3389/fpls.2022.940284)
Supplement: Supplementary file 7 [file Table_1.xlsx]

## Sheet: Table S1
Table S1. Information of the PMEI gene family in B. napus.
Gene ID	Gene alias	Gene name	No of extron	Genomic location	Subgenome	Protein length (AA)	Molecular weigh (Da)	Isoelectric point	Homologs in Arabidopsis	Name of Homologs in Arabidopsis
BnaA01g13070D	GSBRNA2T00079532001	BnPMEI1	1	chrA01:6557428..6557994	A	188	21091.7	6.72	AT3G27999	AtPMEI43
BnaA01g14010D	GSBRNA2T00056333001	BnPMEI2	2	chrA01:7116844..7118074	A	183	19722.4	5.27	AT4G24640	AtPMEI58
BnaA01g14610D	GSBRNA2T00149681001	BnPMEI3	1	chrA01:7375050..7375649	A	199	21745	8.31	AT4G25250	AtPMEI59
BnaA01g14620D	GSBRNA2T00149680001	BnPMEI4	1	chrA01:7377365..7377964	A	199	21745	8.48	AT4G25250	AtPMEI59
BnaA01g14630D	GSBRNA2T00149679001	BnPMEI5	1	chrA01:7380676..7381263	A	195	21309.1	9.62	AT4G25250	AtPMEI59
BnaA01g14640D	GSBRNA2T00149677001	BnPMEI6	1	chrA01:7382777..7383644	A	201	22088	5.31	AT4G25260	AtPMEI60
BnaA01g27310D	GSBRNA2T00057601001	BnPMEI7	1	chrA01:19068073..19069030	A	176	19035.2	9.23	AT3G17220	AtPMEI39
BnaA01g27330D	GSBRNA2T00057599001	BnPMEI8	2	chrA01:19076859..19077716	A	172	19004.7	9.08	AT3G17152	AtPMEI38
BnaA01g27340D	GSBRNA2T00057598001	BnPMEI9	2	chrA01:19093284..19094040	A	159	17201.5	8.81	AT3G17140	AtPMEI36
BnaA01g27350D	GSBRNA2T00057597001	BnPMEI10	1	chrA01:19094857..19095408	A	183	19760.7	5.37	AT3G17130	AtPMEI35
BnaA02g14590D	GSBRNA2T00096386001	BnPMEI11	2	chrA02:8282303..8283631	A	186	20213.3	6.57	AT5G50030	AtPMEI73
BnaA02g14970D	GSBRNA2T00116567001	BnPMEI12	1	chrA02:8587645..8588145	A	166	17666.5	9.32	AT1G70540	AtPMEI24
BnaA02g15120D	GSBRNA2T00116540001	BnPMEI13	1	chrA02:8686877..8687482	A	201	22073.1	5.09	AT1G70720	AtPMEI25
BnaA02g21340D	GSBRNA2T00104425001	BnPMEI14	1	chrA02:13716472..13717262	A	206	23060.9	10.19	AT4G12390	AtPMEI56
BnaA02g24800D	GSBRNA2T00063422001	BnPMEI15	1	chrA02:18106338..18106874	A	178	19214.6	9.46	AT5G46970	AtPMEI70
BnaA02g24840D	GSBRNA2T00063429001	BnPMEI16	2	chrA02:18152668..18155309	A	176	19351.3	9.04	AT5G46940	AtPMEI67
BnaA02g24870D	GSBRNA2T00063437001	BnPMEI17	1	chrA02:18203820..18204395	A	191	22068.8	8.59	AT1G54620	AtPMEI17
BnaA02g25810D	GSBRNA2T00030925001	BnPMEI18	1	chrA02:18889152..18889775	A	207	22428.5	8.65	AT2G01610	AtPMEI26
BnaA02g33370D	GSBRNA2T00046055001	BnPMEI19	1	chrA02:23915476..23916312	A	201	22315.6	9.44	AT5G62350	AtPMEI81
BnaA02g35810D	GSBRNA2T00048275001	BnPMEI20	2	chrA02_random:535389..536374	A	99	11002.5	5.65	AT5G50030	AtPMEI73
BnaA02g36590D	GSBRNA2T00060492001	BnPMEI21	2	chrA02_random:1125611..1127360	A	154	17346	5.7	AT5G46960	AtPMEI69
BnaA03g05480D	GSBRNA2T00130054001	BnPMEI22	2	chrA03:2503294..2504092	A	172	18994.5	5.09	AT3G17152	AtPMEI38
BnaA03g11770D	GSBRNA2T00075856001	BnPMEI23	2	chrA03:5295414..5296207	A	178	19612.9	8.5	AT5G50040	AtPMEI74
BnaA03g21600D	GSBRNA2T00138908001	BnPMEI24	1	chrA03:10239151..10239801	A	216	23823.5	8.38	AT2G47050	AtPMEI30
BnaA03g22940D	GSBRNA2T00138757001	BnPMEI25	1	chrA03:10929120..10929743	A	207	23759.4	10.08	AT4G00080	AtPMEI52
BnaA03g26250D	GSBRNA2T00151691001	BnPMEI26	2	chrA03:12852888..12853436	A	158	17042.5	4.48	AT4G02250	AtPMEI54
BnaA03g34440D	GSBRNA2T00137498001	BnPMEI27	1	chrA03:16771686..16772237	A	183	20052.2	6.11	AT3G17130	AtPMEI35
BnaA03g47230D	GSBRNA2T00049025001	BnPMEI28	2	chrA03:24211647..24212588	A	242	27207.2	8.63	AT4G25250	AtPMEI59
BnaA03g47240D	GSBRNA2T00049026001	BnPMEI29	1	chrA03:24212781..24213380	A	199	22024.3	8.69	AT4G25250	AtPMEI59
BnaA03g47250D	GSBRNA2T00049027001	BnPMEI30	1	chrA03:24215056..24216041	A	201	22066.2	5.08	AT4G25260	AtPMEI60
BnaA03g57460D	GSBRNA2T00063589001	BnPMEI31	1	chrA03_random:1165948..1166610	A	220	24246	9.12	AT5G62360	AtPMEI82
BnaA04g26890D	GSBRNA2T00088645001	BnPMEI32	1	chrA04:19011278..19012195	A	216	23739.7	8.97	AT2G47050	AtPMEI30
BnaA05g00320D	GSBRNA2T00133030001	BnPMEI33	1	chrA05:132109..133203	A	206	23311	9.42	AT2G47670	AtPMEI32
BnaA05g00800D	GSBRNA2T00132968001	BnPMEI34	1	chrA05:467361..468011	A	216	23678.6	9.23	AT2G47050	AtPMEI30
BnaA05g13610D	GSBRNA2T00125586001	BnPMEI35	1	chrA05:8266287..8266817	A	176	19044.4	4.45	AT1G55770	AtPMEI19
BnaA05g17590D	GSBRNA2T00023926001	BnPMEI36	1	chrA05:12491596..12492129	A	177	19328.9	5.2	AT1G48020	AtPMEI14
BnaA05g22870D	GSBRNA2T00153816001	BnPMEI37	2	chrA05:17329204..17330860	A	202	23015.5	9.15	AT3G17227	AtPMEI41
BnaA05g22890D	GSBRNA2T00153811001	BnPMEI38	1	chrA05:17353682..17354242	A	186	20205.4	8.73	AT3G17227	AtPMEI41
BnaA05g26320D	GSBRNA2T00000148001	BnPMEI39	1	chrA05:19313887..19314432	A	181	19924.3	9.1	AT3G12880	AtPMEI34
BnaA06g00180D	GSBRNA2T00095764001	BnPMEI40	1	chrA06:82957..83484	A	175	18799.3	4.39	AT1G55770	AtPMEI19
BnaA06g04140D	GSBRNA2T00156317001	BnPMEI41	2	chrA06:2530436..2531603	A	160	17358.5	6.35	AT1G47960	AtPMEI12
BnaA06g05420D	GSBRNA2T00156176001	BnPMEI42	1	chrA06:3076241..3076870	A	209	24010.9	5.9	AT1G09360	AtPMEI4
BnaA06g05430D	GSBRNA2T00156175001	BnPMEI43	1	chrA06:3077859..3079654	A	174	19165.3	8.56	AT1G09370	AtPMEI5
BnaA06g06610D	GSBRNA2T00105252001	BnPMEI44	1	chrA06:3562212..3562718	A	168	18445.3	9.78	AT1G10770	AtPMEI1
BnaA06g09680D	GSBRNA2T00081744001	BnPMEI45	1	chrA06:5174235..5174840	A	201	22033.9	8.64	AT1G14890	AtPMEI2
BnaA06g17230D	GSBRNA2T00063083001	BnPMEI46	1	chrA06:9791481..9792319	A	228	24648.4	5.48	AT3G47670	AtPMEI47
BnaA06g17500D	GSBRNA2T00107192001	BnPMEI47	1	chrA06:9962382..9963055	A	202	22269.5	10.11	AT3G47380	AtPMEI45
BnaA06g21790D	GSBRNA2T00109848001	BnPMEI48	1	chrA06:15210517..15211131	A	204	22392.7	9.58	AT5G62350	AtPMEI81
BnaA06g21800D	GSBRNA2T00109850001	BnPMEI49	1	chrA06:15218777..15219507	A	198	21769	7.08	AT5G62360	AtPMEI82
BnaA06g34770D	GSBRNA2T00001873001	BnPMEI50	1	chrA06:22974231..22974869	A	212	23058.4	6.14	AT2G01610	AtPMEI26
BnaA06g35680D	GSBRNA2T00054755001	BnPMEI51	1	chrA06:23433850..23434437	A	195	21898.7	9.34	AT5G46980	AtPMEI71
BnaA06g35690D	GSBRNA2T00054754001	BnPMEI52	1	chrA06:23437087..23437647	A	186	21108.8	7.56	AT1G54620	AtPMEI17
BnaA06g35700D	GSBRNA2T00054753001	BnPMEI53	1	chrA06:23440159..23440743	A	194	22105.7	9.38	AT1G54620	AtPMEI17
BnaA06g35730D	GSBRNA2T00054750001	BnPMEI54	1	chrA06:23446790..23447338	A	182	20616.3	9.75	AT5G46930	AtPMEI66
BnaA06g37840D	GSBRNA2T00096051001	BnPMEI55	1	chrA06_random:196505..197005	A	166	18174	5.21	AT1G09370	AtPMEI5
BnaA06g40340D	GSBRNA2T00023684001	BnPMEI56	1	chrA06_random:1993898..1994425	A	175	19453.4	4.8	AT5G46950	AtPMEI68
BnaA07g10000D	GSBRNA2T00033183001	BnPMEI57	1	chrA07:9586468..9586965	A	165	17660.5	7.55	AT1G23350	AtPMEI11
BnaA07g10080D	GSBRNA2T00033174001	BnPMEI58	1	chrA07:9608009..9609003	A	224	24684.8	5.09	AT1G23205	AtPMEI10
BnaA07g14530D	GSBRNA2T00098503001	BnPMEI59	1	chrA07:12821686..12822294	A	202	21809	4.18	AT5G38610	AtPMEI65
BnaA07g19230D	GSBRNA2T00099084001	BnPMEI60	1	chrA07:15473670..15474317	A	215	23486.9	7.63	AT3G62180	AtPMEI50
BnaA07g23730D	GSBRNA2T00099635001	BnPMEI61	1	chrA07:17807007..17807642	A	211	23259.4	5.09	AT1G23205	AtPMEI10
BnaA08g00300D	GSBRNA2T00074668001	BnPMEI62	1	chrA08:207170..207691	A	173	19091.6	4.3	AT1G55770	AtPMEI19
BnaA08g03570D	GSBRNA2T00094938001	BnPMEI63	1	chrA08:2899575..2900108	A	177	19120.9	8.28	AT1G48020	AtPMEI14
BnaA08g31370D	GSBRNA2T00004729001	BnPMEI64	1	chrA08_random:1973983..1974759	A	201	21888.7	6.89	AT1G14890	AtPMEI2
BnaA09g00690D	GSBRNA2T00007840001	BnPMEI65	2	chrA09:381673..382227	A	160	17357.8	4.68	AT4G02250	AtPMEI54
BnaA09g06030D	GSBRNA2T00094657001	BnPMEI66	1	chrA09:2934067..2934842	A	199	21507.7	6.64	AT5G62360	AtPMEI82
BnaA09g06930D	GSBRNA2T00005785001	BnPMEI67	1	chrA09:3369121..3369651	A	176	19021.9	7.53	AT5G64620	AtPMEI83
BnaA09g12730D	GSBRNA2T00086395001	BnPMEI68	2	chrA09:6778134..6779136	A	203	22470	9.62	AT1G62770	AtPMEI23
BnaA09g12760D	GSBRNA2T00086391001	BnPMEI69	1	chrA09:6795527..6796141	A	204	22368.4	5.37	AT1G62760	AtPMEI22
BnaA09g13080D	GSBRNA2T00096478001	BnPMEI70	1	chrA09:7121389..7121910	A	173	19488.9	11.87	AT1G60760	AtPMEI21
BnaA09g18750D	GSBRNA2T00117732001	BnPMEI71	1	chrA09:11687683..11688297	A	204	22186.8	5.4	AT2g01610	AtPMEI26
BnaA09g20980D	GSBRNA2T00145405001	BnPMEI72	1	chrA09:13747249..13747863	A	204	22904.8	10.29	AT4G12390	AtPMEI56
BnaA09g30040D	GSBRNA2T00015813001	BnPMEI73	2	chrA09:22378820..22379582)	A	186	20731.3	5.14	AT1G23205	AtPMEI10
BnaA09g31110D	GSBRNA2T00079595001	BnPMEI74	6	chrA09:23146384..23149318	A	356	38796.5	8.2	AT1G23350	AtPMEI11
BnaA09g39730D	GSBRNA2T00049472001	BnPMEI75	1	chrA09:28111266..28111916	A	216	24033.9	9.11	AT3G62180	AtPMEI50
BnaA09g40170D	GSBRNA2T00049519001	BnPMEI76	1	chrA09:28264427..28265237	A	189	20722.9	10.03	AT3G62820	AtPMEI51
BnaA09g47760D	GSBRNA2T00057413001	BnPMEI77	1	chrA09:32145668..32146174	A	168	18343.3	9.63	AT1G10770	AtPMEI1
BnaA10g05640D	GSBRNA2T00064675001	BnPMEI78	2	chrA10:3437743..3438667	A	188	20237.9	4.7	AT5G50030	AtPMEI73
BnaA10g07890D	GSBRNA2T00110194001	BnPMEI79	1	chrA10:6408851..6409465	A	204	22628.1	9.09	AT5G51520	AtPMEI78
BnaA10g14750D	GSBRNA2T00154203001	BnPMEI80	1	chrA10:11669420..11670193	A	203	21641.8	9.23	AT5G20740	AtPMEI62
BnaA10g27380D	GSBRNA2T00069515001	BnPMEI81	1	chrA10:17244456..17245043	A	195	22139	9.61	AT1G54620	AtPMEI17
BnaAnng02690D	GSBRNA2T00005971001	BnPMEI82	2	chrAnn_random:2219890..2221069	A	218	24676.3	9.16	AT3G05741	AtPMEI33
BnaAnng07260D	GSBRNA2T00076683001	BnPMEI83	1	chrAnn_random:7134240..7134782	A	180	20626.2	8.75	AT5G46970	AtPMEI70
BnaAnng18590D	GSBRNA2T00037893001	BnPMEI84	1	chrAnn_random:19856463..19857098	A	211	24124.9	9.98	AT4G00080	AtPMEI52
BnaAnng18940D	GSBRNA2T00039334001	BnPMEI85	2	chrAnn_random:20108562..20109293	A	181	19850.6	8.8	AT4G00872	AtPMEI53
BnaAnng19330D	GSBRNA2T00041250001	BnPMEI86	2	chrAnn_random:20906167..20906863	A	172	18896.8	5.4	AT2G10970	AtPMEI27
BnaAnng24730D	GSBRNA2T00065172001	BnPMEI87	2	chrAnn_random:28604513..28605584	A	224	24641.1	9.21	AT5G20860	AtPMEI63
BnaAnng27150D	GSBRNA2T00074147001	BnPMEI88	1	chrAnn_random:31085500..31085997	A	165	17743.4	8.21	At1g23350	AtPMEI11
BnaAnng29070D	GSBRNA2T00082000001	BnPMEI89	1	chrAnn_random:33246791..33247342	A	183	19806.9	7.61	AT3G17130	AtPMEI35
BnaAnng30240D	GSBRNA2T00087337001	BnPMEI90	1	chrAnn_random:34494741..34495364	A	181	19831	9.11	AT5G64620	AtPMEI83
BnaAnng37250D	GSBRNA2T00113131001	BnPMEI91	2	chrAnn_random:42229385..42229970	A	170	18429.1	4.69	AT4G02250	AtPMEI54
BnaAnng40430D	GSBRNA2T00026000001	BnPMEI92	1	chrAnn_random:46197575..46198060	A	161	17419.9	7.76	AT5G46940	AtPMEI67
BnaC01g16500D	GSBRNA2T00116083001	BnPMEI93	2	chrC01:11313531..11314792	C	183	19735.4	5.29	AT4G24640	AtPMEI58
BnaC01g17190D	GSBRNA2T00157638001	BnPMEI94	1	chrC01:11767483..11768082	C	199	21759	8.68	AT4G25250	AtPMEI59
BnaC01g17200D	GSBRNA2T00157635001	BnPMEI95	1	chrC01:11782313..11782900	C	195	21301	9.45	AT4G25250	AtPMEI59
BnaC01g17210D	GSBRNA2T00157634001	BnPMEI96	1	chrC01:11784841..11785588	C	201	22120	4.92	AT4G25260	AtPMEI60
BnaC01g25100D	GSBRNA2T00125851001	BnPMEI97	2	chrC01:20392538..20393759	C	285	31225.2	7.02	AT3G47400	AtPMEI46
BnaC01g34780D	GSBRNA2T00067122001	BnPMEI98	2	chrC01:34020431..34021322	C	172	18922.6	8.59	AT3G17152	AtPMEI38
BnaC01g34800D	GSBRNA2T00067126001	BnPMEI99	2	chrC01:34032874..34033673	C	175	19114	8.58	AT3G17140	AtPMEI36
BnaC01g42800D	GSBRNA2T00010674001	BnPMEI100	2	chrC01_random:1943487..1944244	C	221	24436.1	9.11	AT3G47670	AtPMEI47
BnaC01g43950D	GSBRNA2T00048079001	BnPMEI101	1	chrC01_random:3596823..3597275	C	150	16383	9.6	AT3G17220	AtPMEI39
BnaC02g15720D	GSBRNA2T00153000001	BnPMEI102	1	chrC02:11327736..11328365	C	209	22921.5	8.97	AT5G51520	AtPMEI78
BnaC02g19120D	GSBRNA2T00135345001	BnPMEI103	2	chrC02:15323685..15324952	C	186	20260.3	5.02	AT5G50030	AtPMEI73
BnaC02g19950D	GSBRNA2T00030962001	BnPMEI104	1	chrC02:16307863..16308363	C	166	17844.8	9.6	AT1G70540	AtPMEI24
BnaC02g20150D	GSBRNA2T00030992001	BnPMEI105	1	chrC02:16522969..16523577	C	202	22123.1	5.24	AT1G70720	AtPMEI25
BnaC02g32540D	GSBRNA2T00146713001	BnPMEI106	2	chrC02:35119941..35120468	C	154	17156.7	7.59	AT5G46960	AtPMEI69
BnaC02g32920D	GSBRNA2T00076958001	BnPMEI107	1	chrC02:35450133..35450669	C	178	19283.8	9.51	AT5G46970	AtPMEI70
BnaC02g32980D	GSBRNA2T00076973001	BnPMEI108	2	chrC02:35517470..35517997	C	154	17010.5	4.84	AT5G46960	AtPMEI69
BnaC02g32990D	GSBRNA2T00076974001	BnPMEI109	2	chrC02:35521370..35521897	C	154	17056.5	5.17	AT5G46960	AtPMEI69
BnaC02g33020D	GSBRNA2T00076977001	BnPMEI110	1	chrC02:35545061..35548025	C	191	21849.4	8.39	AT1G54620	AtPMEI17
BnaC02g34050D	GSBRNA2T00091738001	BnPMEI111	1	chrC02:36329091..36329714	C	207	22448.6	8.65	AT2g01610	AtPMEI26
BnaC02g41260D	GSBRNA2T00120321001	BnPMEI112	1	chrC02:44156942..44157334	C	130	14229.6	9.19	AT3G17220	AtPMEI39
BnaC02g46740D	GSBRNA2T00046924001	BnPMEI113	1	chrC02_random:2476239..2476923	C	206	22990.8	10.19	AT4G12390	AtPMEI56
BnaC03g01880D	GSBRNA2T00134348001	BnPMEI114	2	chrC03:907052..909197	C	269	29095.5	9.17	AT5G04970	AtPMEI61
BnaC03g07010D	GSBRNA2T00140462001	BnPMEI115	2	chrC03:3337306..3337989	C	172	18976.6	5.8	AT3G17152	AtPMEI38
BnaC03g10260D	GSBRNA2T00140855001	BnPMEI116	1	chrC03:4946860..4947593	C	204	21972.1	8.67	AT5G20740	AtPMEI62
BnaC03g14450D	GSBRNA2T00077321001	BnPMEI117	2	chrC03:6953880..6954672	C	178	19556.8	8.19	AT5G50040	AtPMEI74
BnaC03g27010D	GSBRNA2T00015926001	BnPMEI118	1	chrC03:15555699..15556322	C	207	23773.5	10.08	At4g00080	AtPMEI52
BnaC03g27610D	GSBRNA2T00015833001	BnPMEI119	2	chrC03:16063216..16064003	C	174	19028.2	8.89	AT5G50040	AtPMEI74
BnaC03g31000D	GSBRNA2T00002426001	BnPMEI120	2	chrC03:18949539..18950087	C	158	16998.3	4.48	AT4G02250	AtPMEI54
BnaC03g34360D	GSBRNA2T00071612001	BnPMEI121	2	chrC03:20839389..20840047	C	193	21579.1	5.81	AT5G53370	AtPMEI79
BnaC03g39870D	GSBRNA2T00123909001	BnPMEI122	1	chrC03:24891876..24892883	C	183	19993	5.9	AT3G17130	AtPMEI35
BnaC03g49650D	GSBRNA2T00141775001	BnPMEI123	1	chrC03:34536526..34537219	C	179	19556.6	9.1	AT5G64620	AtPMEI83
BnaC03g49660D	GSBRNA2T00141774001	BnPMEI124	1	chrC03:34545694..34546252	C	163	17707.6	9.28	AT5G64620	AtPMEI83
BnaC03g50320D	GSBRNA2T00141681001	BnPMEI125	2	chrC03:34961402..34961929	C	153	16719.4	9.1	AT5G46930	AtPMEI66
BnaC03g51710D	GSBRNA2T00145697001	BnPMEI126	1	chrC03:36426655..36427257	C	200	21747.9	7.76	AT5G62360	AtPMEI82
BnaC03g51740D	GSBRNA2T00145703001	BnPMEI127	1	chrC03:36444309..36444923	C	204	22322.5	9.58	AT5G62350	AtPMEI81
BnaC03g57120D	GSBRNA2T00024773001	BnPMEI128	1	chrC03:46362929..46363800	C	227	24654.5	5.35	AT3G47670	AtPMEI47
BnaC03g70830D	GSBRNA2T00032484001	BnPMEI129	1	chrC03:60411042..60411563	C	173	18782.2	4.49	AT1G55770	AtPMEI19
BnaC03g72430D	GSBRNA2T00097761001	BnPMEI130	1	chrC03_random:716837..717487	C	216	23782.5	8.38	AT2G47050	AtPMEI30
BnaC04g00200D	GSBRNA2T00008327001	BnPMEI131	1	chrC04:59722..60733	C	206	23224.9	9.46	AT2G47670	AtPMEI32
BnaC04g00440D	GSBRNA2T00064716001	BnPMEI132	1	chrC04:365364..366014	C	216	23646.7	9.22	AT2G47050	AtPMEI30
BnaC04g19980D	GSBRNA2T00057191001	BnPMEI133	2	chrC04:20872263..20873107	C	206	22692.3	9.53	AT1G62770	AtPMEI23
BnaC04g20020D	GSBRNA2T00057162001	BnPMEI134	1	chrC04:20990403..20990600	C	65	6901.94	6.69	AT5G53370	AtPMEI79
BnaC04g32450D	GSBRNA2T00062712001	BnPMEI135	2	chrC04:34188792..34189460	C	174	18229.2	8.98	AT5G50040	AtPMEI74
BnaC04g51500D	GSBRNA2T00038181001	BnPMEI136	1	chrC04:48806541..48807479	C	216	23705.6	8.97	AT2G47050	AtPMEI30
BnaC05g06880D	GSBRNA2T00100481001	BnPMEI137	1	chrC05:3397688..3398317	C	209	23935.9	6.68	AT1G09360	AtPMEI4
BnaC05g06890D	GSBRNA2T00100478001	BnPMEI138	1	chrC05:3404611..3405114	C	167	18547.5	5.13	AT1G09370	AtPMEI5
BnaC05g06920D	GSBRNA2T00100471001	BnPMEI139	1	chrC05:3414145..3414675	C	176	19506.5	5.73	AT1G09370	AtPMEI5
BnaC05g08260D	GSBRNA2T00008834001	BnPMEI140	1	chrC05:4337959..4338465	C	168	18444.3	9.54	AT1G10770	AtPMEI1
BnaC05g11140D	GSBRNA2T00010874001	BnPMEI141	1	chrC05:6541535..6542083	C	182	20025.8	7.64	AT1G14890	AtPMEI2
BnaC05g18060D	GSBRNA2T00119471001	BnPMEI142	1	chrC05:11812803..11813300	C	165	17660.5	7.55	AT1G23350	AtPMEI11
BnaC05g36210D	GSBRNA2T00101834001	BnPMEI143	1	chrC05:35352702..35353274	C	190	21201.2	9.04	AT3G17227	AtPMEI41
BnaC05g36240D	GSBRNA2T00101844001	BnPMEI144	1	chrC05:35428551..35429111	C	186	20261.5	8.73	AT3G17227	AtPMEI41
BnaC06g01490D	GSBRNA2T00013297001	BnPMEI145	2	chrC06:2234984..2236185	C	163	17771	8.84	AT1G47960	AtPMEI12
BnaC06g11080D	GSBRNA2T00034706001	BnPMEI146	1	chrC06:13100986..13101516	C	176	19158.6	4.52	AT1G55770	AtPMEI19
BnaC06g12400D	GSBRNA2T00092302001	BnPMEI147	1	chrC06:14874857..14875465	C	202	21922.2	4.2	AT5G38610	AtPMEI65
BnaC06g18410D	GSBRNA2T00028959001	BnPMEI148	1	chrC06:20795266..20795913	C	215	23335.6	7.63	AT3G62180	AtPMEI50
BnaC06g24540D	GSBRNA2T00022117001	BnPMEI149	1	chrC06:26298034..26300020	C	210	23190.3	5.09	AT1G23205	AtPMEI10
BnaC07g04380D	GSBRNA2T00144630001	BnPMEI150	2	chrC07:6620049..6620633	C	172	18935.9	5.35	AT2G10970	AtPMEI27
BnaC07g13130D	GSBRNA2T00061776001	BnPMEI151	1	chrC07:18615301..18615798	C	165	17790.6	8.54	AT1G23350	AtPMEI11
BnaC07g19710D	GSBRNA2T00128721001	BnPMEI152	1	chrC07:26510568..26511116	C	182	20631.3	9.6	AT5G46930	AtPMEI66
BnaC07g19790D	GSBRNA2T00128734001	BnPMEI153	1	chrC07:26549642..26550202	C	186	21025.8	8.69	AT1G54620	AtPMEI17
BnaC07g19800D	GSBRNA2T00128736001	BnPMEI154	1	chrC07:26563734..26564321	C	195	22059.9	9.34	AT1G54620	AtPMEI17
BnaC07g20950D	GSBRNA2T00060195001	BnPMEI155	1	chrC07:27590945..27591583	C	212	23043.4	7.54	AT2G01610	AtPMEI26
BnaC07g39440D	GSBRNA2T00154499001	BnPMEI156	1	chrC07:40302999..40303262	C	87	9863.08	4.77	AT4G25250	AtPMEI59
BnaC07g39450D	GSBRNA2T00154500001	BnPMEI157	1	chrC07:40305089..40306070	C	201	22010	4.98	AT4G25260	AtPMEI60
BnaC08g03920D	GSBRNA2T00128143001	BnPMEI158	1	chrC08:4093753..4094286	C	177	19156	8.62	AT1G48020	AtPMEI14
BnaC08g06300D	GSBRNA2T00153201001	BnPMEI159	1	chrC08:8760038..8760535	C	165	17832.6	8.15	AT1G23350	AtPMEI11
BnaC08g14860D	GSBRNA2T00096179001	BnPMEI160	1	chrC08:19543552..19544118	C	188	21430.1	6.82	AT1G11593	AtPMEI8
BnaC08g16460D	GSBRNA2T00139804001	BnPMEI161	1	chrC08:20471669..20472464	C	201	21897.7	6.58	AT1G14890	AtPMEI2
BnaC08g21020D	GSBRNA2T00121738001	BnPMEI162	1	chrC08:23590063..23590629	C	188	21515.5	9.92	AT3G49330	AtPMEI48
BnaC08g32060D	GSBRNA2T00127081001	BnPMEI163	1	chrC08:31234993..31235643	C	216	24027.9	9.12	AT3G62180	AtPMEI50
BnaC08g32510D	GSBRNA2T00127138001	BnPMEI164	1	chrC08:31406966..31407721	C	189	20766	9.87	AT3G62820	AtPMEI51
BnaC09g05590D	GSBRNA2T00146184001	BnPMEI165	1	chrC09:3285987..3286667	C	199	21568.7	6.22	AT5G62360	AtPMEI82
BnaC09g06450D	GSBRNA2T00134709001	BnPMEI166	4	chrC09:3892502..3895332	C	268	29806.8	5.01	AT5G64620	AtPMEI83
BnaC09g13080D	GSBRNA2T00050550001	BnPMEI167	2	chrC09:9648459..9649460	C	203	22403.1	9.59	AT1G62770	AtPMEI23
BnaC09g13100D	GSBRNA2T00050547001	BnPMEI168	1	chrC09:9685453..9686067	C	204	22464.6	5.57	AT1G62760	AtPMEI22
BnaC09g19840D	GSBRNA2T00115630001	BnPMEI169	1	chrC09:16928339..16928881	C	180	20609.2	8.59	AT5G46970	AtPMEI70
BnaC09g19860D	GSBRNA2T00115628001	BnPMEI170	1	chrC09:16932107..16932448	C	113	12883.3	9.4	AT5G46940	AtPMEI67
BnaC09g20800D	GSBRNA2T00095623001	BnPMEI171	1	chrC09:17941579..17942193	C	204	22296.9	5.04	AT2G01610	AtPMEI26
BnaC09g37120D	GSBRNA2T00094352001	BnPMEI172	1	chrC09:40468113..40468952	C	196	21029.2	9.21	AT5G20740	AtPMEI62
BnaCnng03700D	GSBRNA2T00032397001	BnPMEI173	1	chrCnn_random:2872592..2873182	C	196	22213.7	9.09	AT1G54620	AtPMEI17
BnaCnng22160D	GSBRNA2T00006729001	BnPMEI174	1	chrCnn_random:20771651..20772265	C	204	22889.7	10.21	AT4G12390	AtPMEI56
BnaCnng23690D	GSBRNA2T00008042001	BnPMEI175	1	chrCnn_random:22080560..22081012	C	150	16230.8	7.95	AT3G12880	AtPMEI34
BnaCnng32970D	GSBRNA2T00023430001	BnPMEI176	2	chrCnn_random:31290977..31291672	C	169	18860.7	9.74	AT2G31430	AtPMEI29
BnaCnng34330D	GSBRNA2T00025572001	BnPMEI177	2	chrCnn_random:32472937..32474548	C	181	20190.8	8.16	AT4G00872	AtPMEI53
BnaCnng40360D	GSBRNA2T00036328001	BnPMEI178	2	chrCnn_random:38956077..38957384	C	152	17022.5	6.46	AT1G54980	AtPMEI18
BnaCnng52530D	GSBRNA2T00056659001	BnPMEI179	1	chrCnn_random:52066626..52067120	C	164	17533.4	8.24	AT1G23350	AtPMEI11
BnaCnng59740D	GSBRNA2T00076015001	BnPMEI180	1	chrCnn_random:59517685..59518299	C	204	22638.1	9.07	AT5G51520	AtPMEI78
BnaCnng65360D	GSBRNA2T00092474001	BnPMEI181	2	chrCnn_random:65073610..65074281	C	174	18244.3	9.22	AT5G50040	AtPMEI74
BnaCnng68380D	GSBRNA2T00003443001	BnPMEI182	1	chrCnn_random:68017136..68017657	C	173	19519.9	11.69	AT1G60760	AtPMEI21
BnaCnng69780D	GSBRNA2T00007520001	BnPMEI183	1	chrCnn_random:69781292..69781965	C	202	22224.7	10.17	AT3G47380	AtPMEI45
BnaCnng70070D	GSBRNA2T00007939001	BnPMEI184	1	chrCnn_random:70076772..70077305	C	177	19327	5.05	AT1G48020	AtPMEI14
BnaCnng70440D	GSBRNA2T00008565001	BnPMEI185	1	chrCnn_random:70473152..70473766	C	204	22537	8.98	AT5G51520	AtPMEI78
BnaCnng76140D	GSBRNA2T00025069001	BnPMEI186	1	chrCnn_random:77177104..77177837	C	203	21875	8.67	AT5G20740	AtPMEI62
BnaCnng76330D	GSBRNA2T00025535001	BnPMEI187	1	chrCnn_random:77492690..77493280	C	183	19815.9	7.61	AT3G17130	AtPMEI35
BnaCnng77430D	GSBRNA2T00028437001	BnPMEI188	1	chrCnn_random:78872968..78873474	C	168	18394.2	4.97	AT1G09370	AtPMEI5
BnaCnng78530D	GSBRNA2T00033923001	BnPMEI189	1	chrCnn_random:80264225..80265156	C	211	23113.3	5.32	AT1G23205	AtPMEI10
BnaUnng03320D	GSBRNA2T00089554001	BnPMEI190	3	chrUnn_random:4757976..4758974	C	136	14958.1	7.62	AT5G50030	AtPMEI73
